# Supplementary material for: Identification of Molecular Markers Associated with Prostate Cancer Subtypes: An Integrative Bioinformatics Approach
Source: MDPI journal article supplement (doi:10.3390/biom14010087), 2024-01-10
Supplement: s1 [file s1]

## Supplementary Material

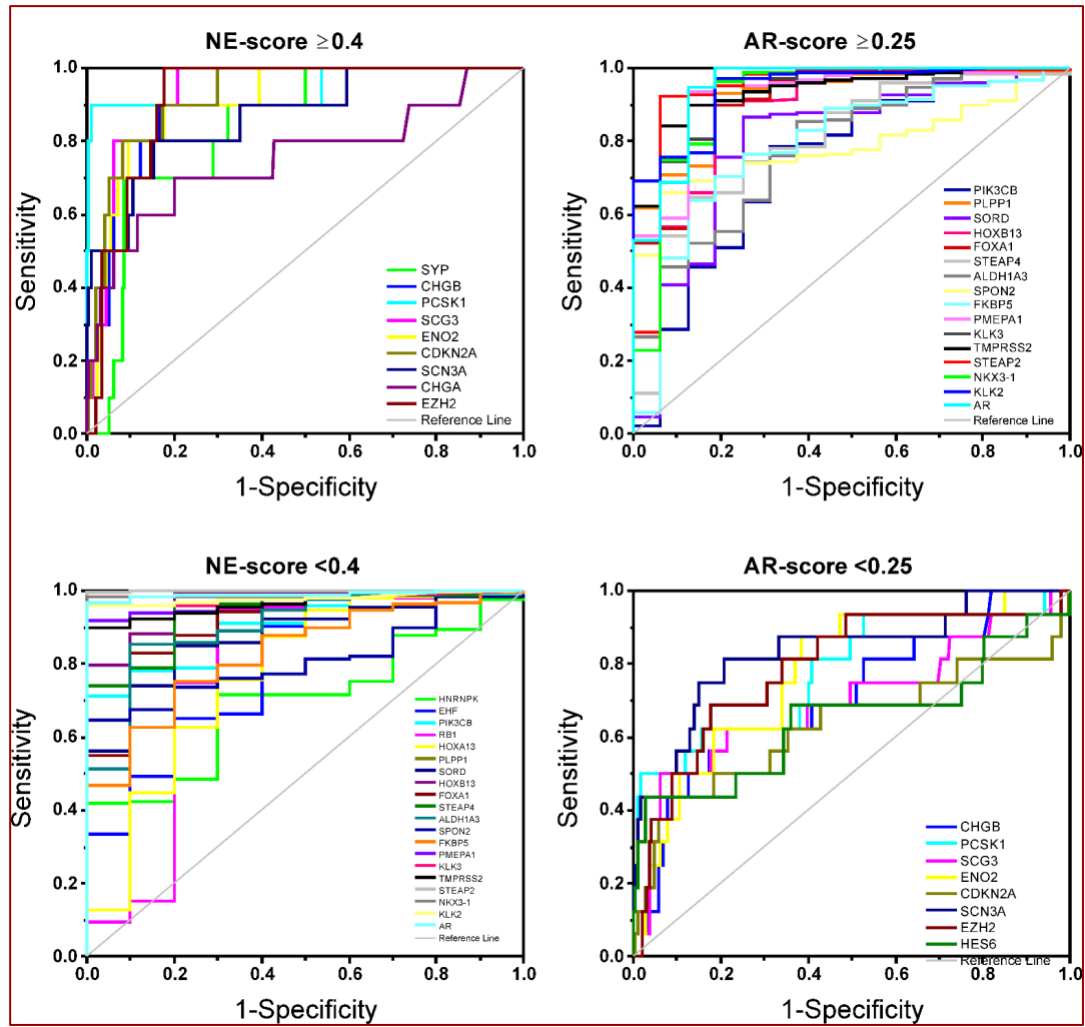

**Figure S1.** ROC curves performed to evaluate the diagnostic efficiency in discriminating between AR positive and NE positive CRPC samples by SU2C/PCF study (208 patients). Only significant AUC values  $>0.6$  (Asymptotic Probability  $< 0.05$ ) are reported.

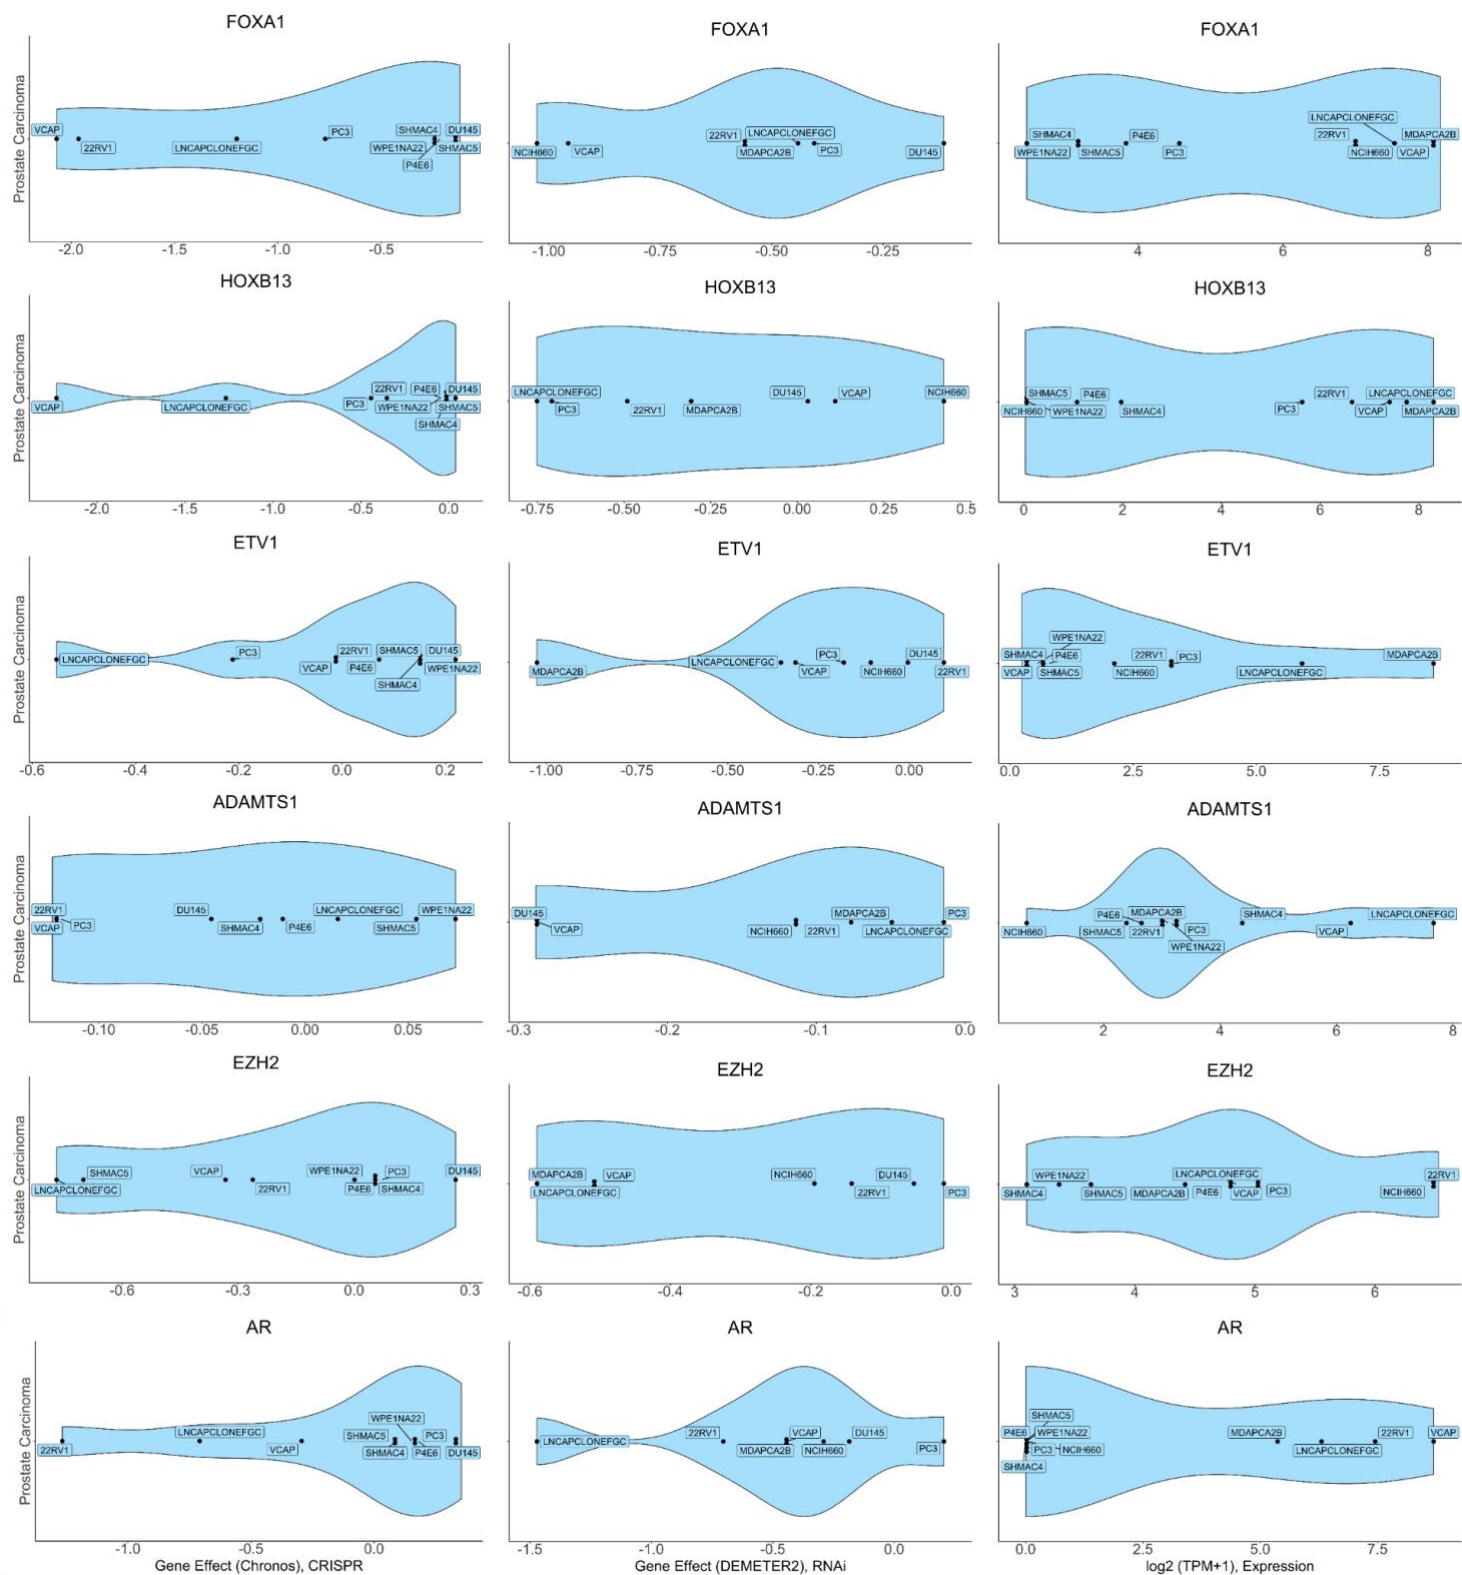

**Figure S2.** Violin plots showing the Gene effect scores from CRISPR (left panel) and RNAi (middle panel) experiments, and log<sub>2</sub> (TPM+1) expression values (right panel) of FOXA1, HOXB13, ETV1, ADAMTS1, EZH2 and AR genes in androgen-sensitive PCa (LNCaP, MDAPC2A, MDAPC2A, P4E6) or CRPC (22Rv1, VCaP) cell lines, and androgen-insensitive PCa (SHMAC4, SHMAC5) or CRPC (PC3, DU145, NCIH660) cell line.

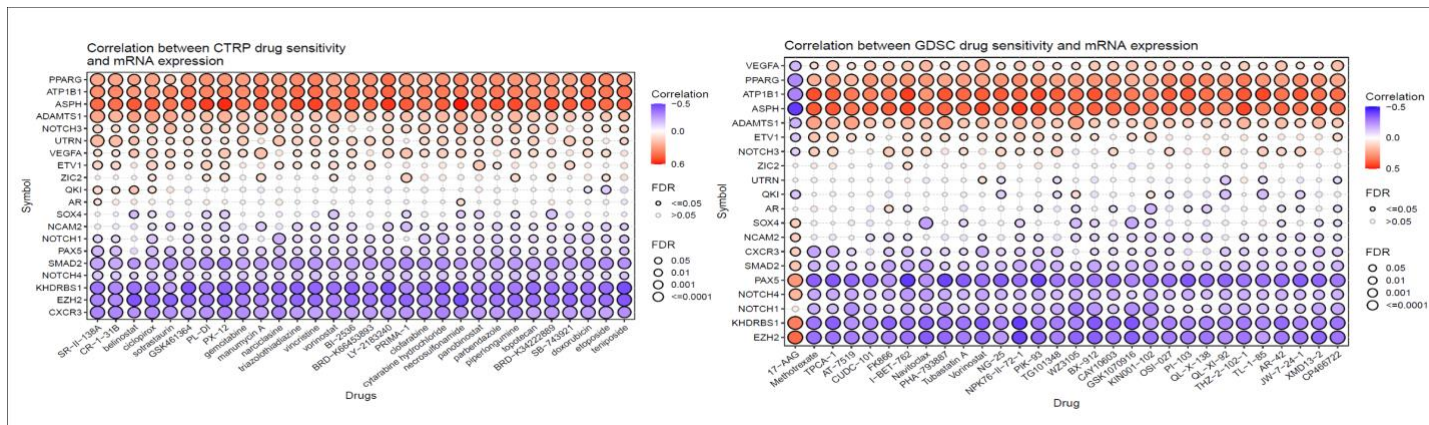

**Figure S3.** Correlation matrix between over-expressed PCa-gene involved in PCa progression to metastatic hormone sensitive (mPCa) or castration resistant (mCRPC) phenotypes and the sensitivity of CTRP (left) and GDSC (right) drugs in pan-cancer

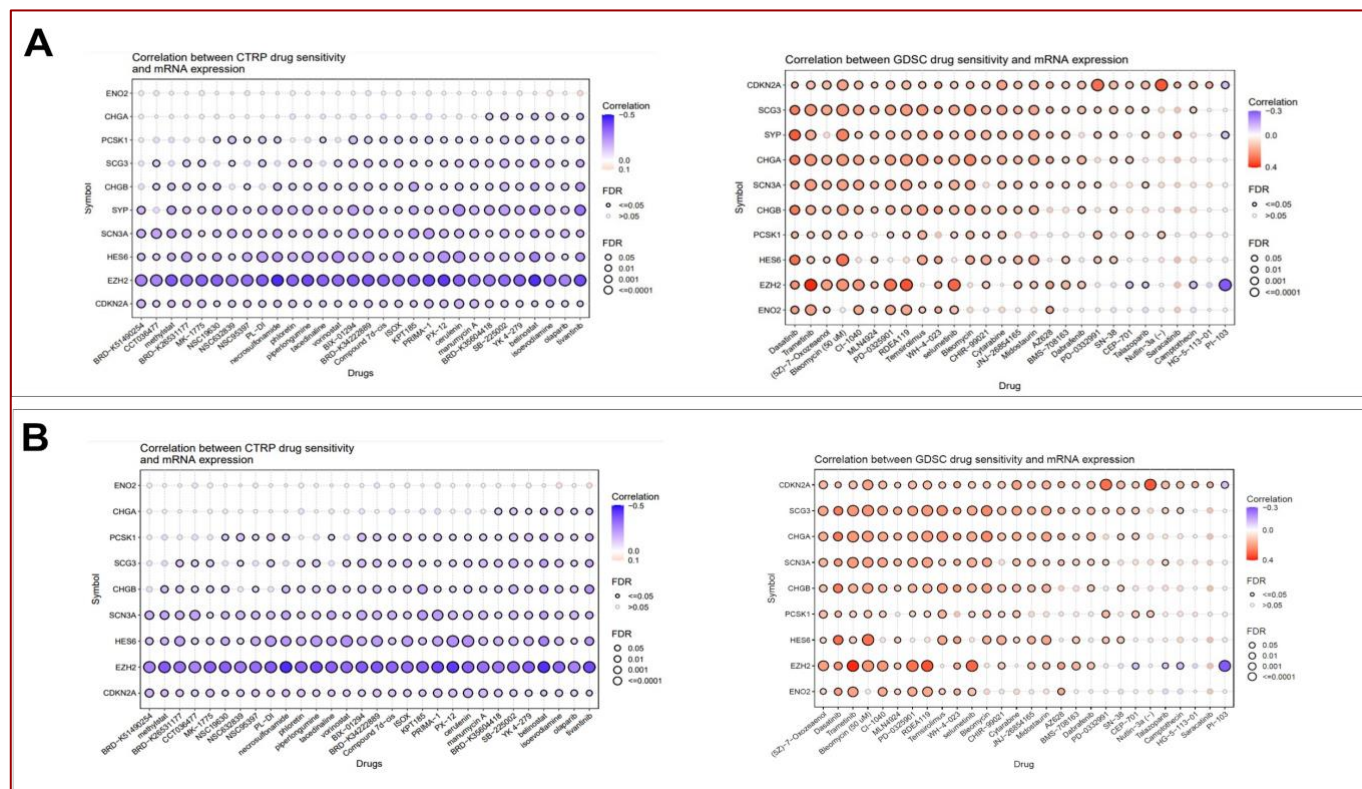

**Figure S4.** Correlation matrix between CRPC-gene set over-expressed in Adeno-CRPC (A) or in NE-CRPC (B) and the sensitivity of CTRP (left) and GDSC (right) drugs in pan-cancer.

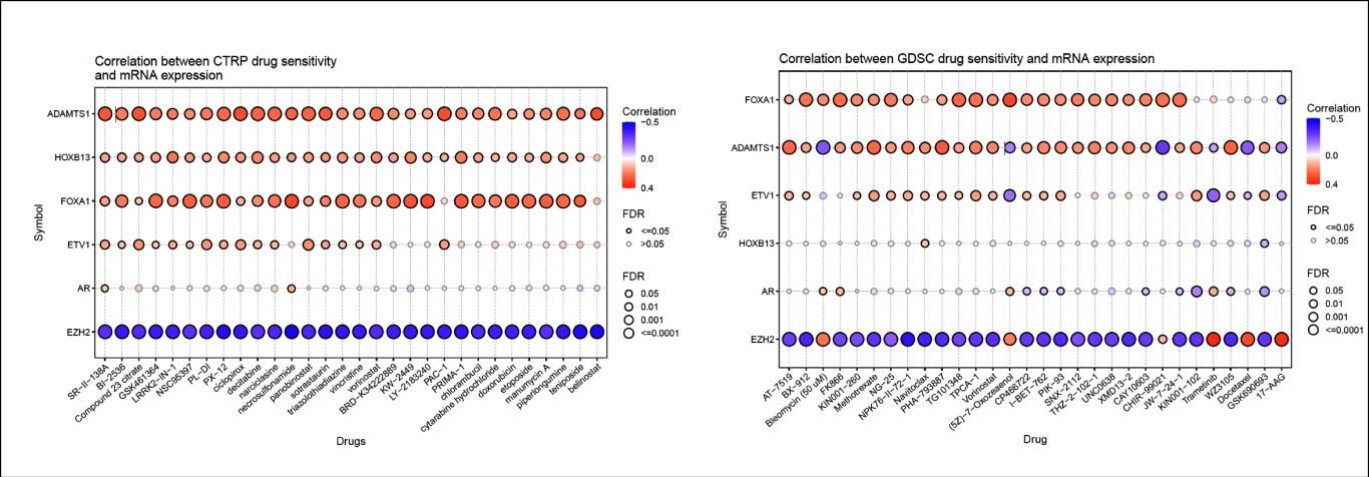

**Figure S5.** Correlation matrix between essential genes for the survival of PCa and CRPC cells and the sensitivity of CTRP (left) and GDSC (right) drugs in pan-cancer.

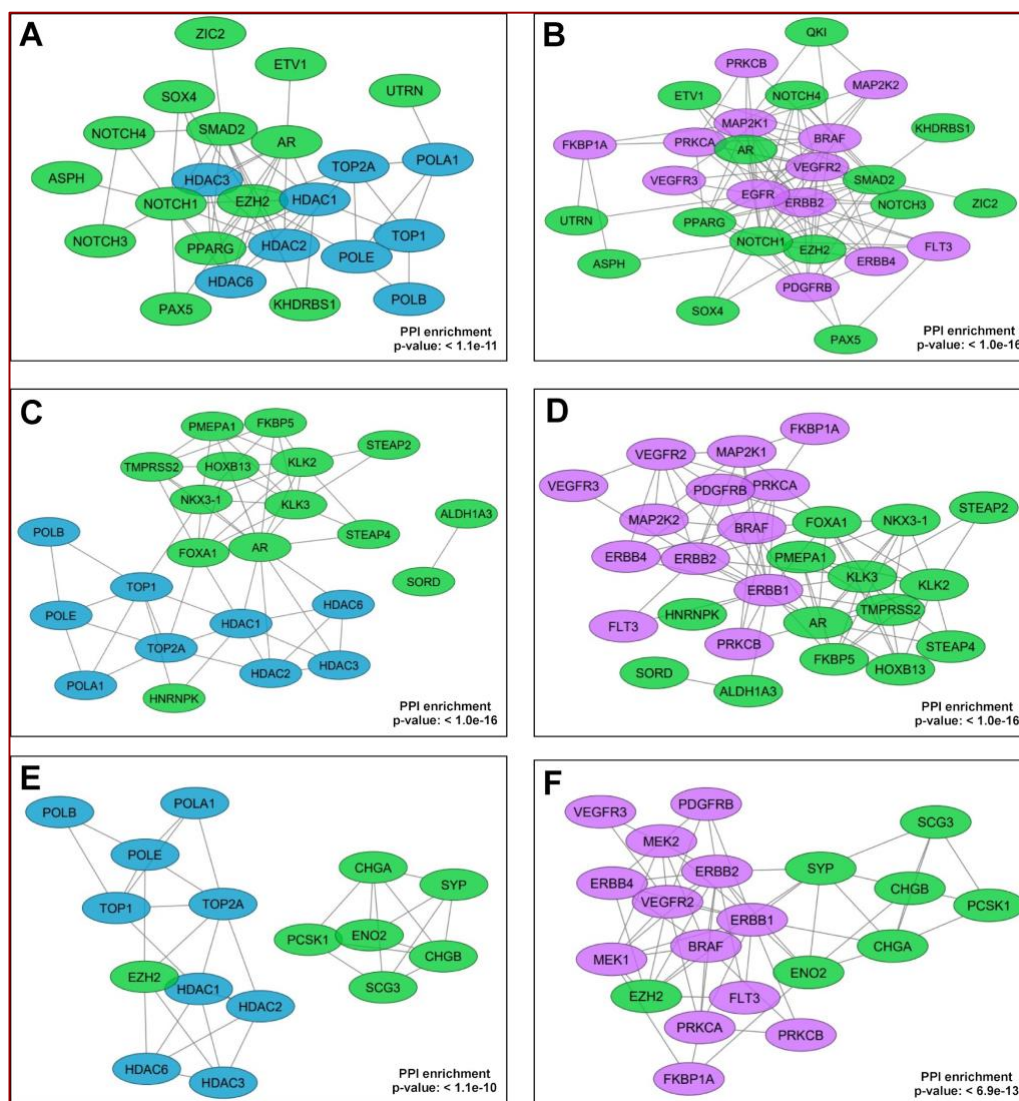

Figure S6. PPI networks showing the connections between the upregulated PCa (A, B), CRPC AR+ (C, D) and CRPC AR- (E, F) genes and the genes involved in the regulation of epigenetic transcription (A, C, E) or MAP kinase signal transduction (B, D, F) targeted by drugs reported in Table S11. The networks were obtained by using the STRING database and edited through the Cytoscape software (v3.9.9). The enrichment p-values are shown in each network box and indicate that these proteins have more interactions than expected and are, thus, biologically connected. Colour node: Green: PCa or CRPC gene set; Blue: epigenetic transcription regulation gene; Violet: MAP kinase signal transduction gene.

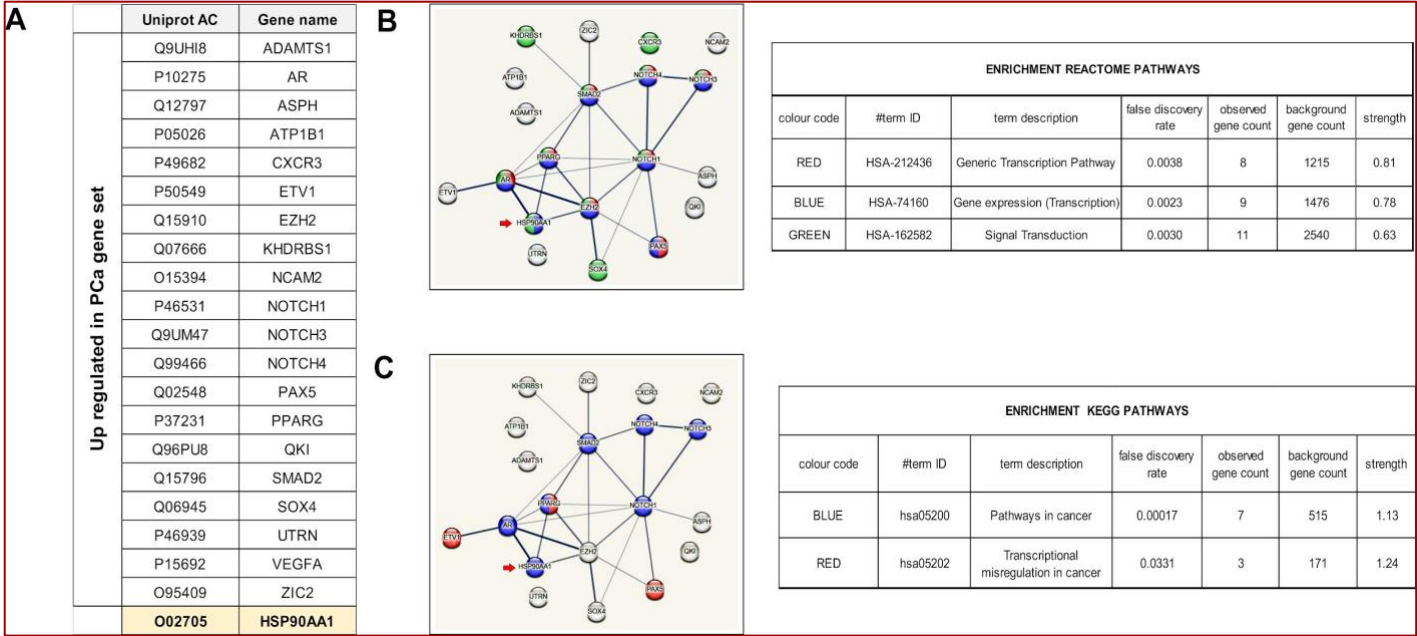

Figure S7. PPI networks showing the connections between the upregulated genes of the PCa gene set (A) and HSP90 (red arrow). The proteins involved in significantly enriched Reactome (B) or KEGG (C) pathways are highlighted. The networks and the enrichment results were obtained by using the STRING database.

**Table S1.** CRPC datasets used in this study

| Ref. | # Genes | Gene list                                                                                                                                                                                                                                                   | CRPC phenotype                                 | Dataset                                                                           |
|------|---------|-------------------------------------------------------------------------------------------------------------------------------------------------------------------------------------------------------------------------------------------------------------|------------------------------------------------|-----------------------------------------------------------------------------------|
| [26] | 8       | AR, FOXA1, HOXB13, KLK3, NKX3-1, STEAP2, TMPRSS2, KLK2                                                                                                                                                                                                      | AR driven,<br>non-AR driven                    | GSE101607                                                                         |
| [29] | 38      | AR, FOXA1, AKT1, TP53, AMER1, APC, ATM, BRAF, BRCA1, BRCA2, CCND1, CDK4, CDKN1B, CDKN2A, CDKN2B, CHD1, CTNNB1, ERF, ETS1, FANCA, KRAS, MLH1, MSH2, NCOR1, NCOR2, PIK3CA, PIK3CB, PIK3R1, PTEN, RAD51B, RAD51C, RAF1, RB1, RNF43, RSPO2, SPOP, ZBTB16, ZNRF3 | metastatic                                     | cBioPortal<br>Metastatic Prostate Adenocarcinoma (SU2C/PCF Dream Team, Cell 2015) |
| [27] | 306     | Supplementary table 5 from Harrison et al. paper: Meta genes with outlier expression in 60-80% (9-12) of 15 high-grade NEPC patients<br><br>178 Up-genes<br><br>128 Down-genes                                                                              | neuroendocrine,<br>small cell                  | GSE104786                                                                         |
| [28] | 20      | Up in AR+: KLK3, KLK2, TMPRSS2, FKBP5, NKX3-1, PPAP2A, PMEPA1, PART1, ALDH1A3, STEAP4<br><br>Up in NE+: SYP, CHGA, CHGB, ENO2, CHRNA2, SCG3, SCN3A, PCSK1, ELAVL4, NKX2-1                                                                                   | AR driven,<br>non-AR driven,<br>neuroendocrine | GSE77930                                                                          |

**Table S2.** List of the 32 proteins identified in previous papers by *in vitro* models.

| Uniprot AC | Gene name | Protein name                                                                |
|------------|-----------|-----------------------------------------------------------------------------|
| O43707     | ACTN4     | Alpha-actinin-4                                                             |
| Q9UHI8     | ADAMTS1   | A disintegrin and metalloproteinase with thrombospondin motifs 1            |
| P31749     | AKT1      | RAC-alpha serine/threonine-protein kinase                                   |
| P51648     | ALDH3A2   | Aldehyde dehydrogenase family 3 member A2                                   |
| P10275     | AR        | Androgen receptor                                                           |
| Q12797     | ASPH      | Aspartyl/asparaginyl beta-hydroxylase                                       |
| P05026     | ATP1B1    | Sodium/potassium-transporting ATPase subunit beta-1                         |
| P27824     | CANX      | Calnexin                                                                    |
| Q9NZC4     | EHF       | ETS homologous factor                                                       |
| P29320     | EPHA3     | Ephrin type-A receptor 3                                                    |
| P50549     | ETV1      | ETS translocation variant 1                                                 |
| P61978     | HNRNPK    | Heterogeneous nuclear ribonucleoprotein K                                   |
| Q00839     | HNRNPU    | Heterogeneous nuclear ribonucleoprotein U                                   |
| P31271     | HOXA13    | Homeobox protein Hox-A13                                                    |
| Q92826     | HOXB13    | Homeobox protein Hox-B13                                                    |
| P04792     | HSPB1     | Heat shock protein beta-1                                                   |
| P12268     | IMPDH2    | Inosine-5'-monophosphate dehydrogenase 2                                    |
| Q07666     | KHDRBS1   | KH domain-containing, RNA-binding, signal transduction-associated protein 1 |
| P07288     | KLK3      | Prostate-specific antigen                                                   |
| Q16539     | MAPK14    | Mitogen-activated protein kinase 14                                         |
| P10242     | MYB       | Transcriptional activator Myb                                               |
| O15394     | NCAM2     | Neural cell adhesion molecule 2                                             |
| P09874     | PARP1     | Poly [ADP-ribose] polymerase 1                                              |
| Q02548     | PAX5      | Paired box protein Pax-5                                                    |
| P30086     | PEBP1     | Phosphatidylethanolamine-binding protein 1                                  |
| P37231     | PPARG     | Peroxisome proliferator-activated receptor gamma                            |
| Q96PU8     | QKI       | Protein quaking                                                             |
| Q00796     | SORD      | Sorbitol dehydrogenase                                                      |
| Q9BUD6     | SPON2     | Spondin-2                                                                   |
| P46939     | UTRN      | Utrophin                                                                    |
| P17861     | XBP1      | X-box-binding protein 1                                                     |
| O95409     | ZIC2      | Zinc finger protein ZIC 2                                                   |

**Table S3.** Results obtained with Gene Set Enrichment Analysis (GSEA) using the 32 gene set as query genes. The Hallmark (H), chemical and genetic perturbations (CGP) and canonical pathways (CP) collections in MSigDB were evaluated.

| # Genes in Gene Set (K) | Description                                                                                                                                    | # Genes in Overlap (k) | k/K    | p-value  | FDR q-value | relevant gene in process or pathway regulation |
|-------------------------|------------------------------------------------------------------------------------------------------------------------------------------------|------------------------|--------|----------|-------------|------------------------------------------------|
| 128                     | Genes expressed in at least one prostate cancer cell line but not in normal prostate epithelial cells or stromal cells                         | 7                      | 0.0547 | 3.50E-12 | 1.20E-08    |                                                |
| 101                     | Genes defining response to androgens.                                                                                                          | 4                      | 0.0396 | 7.54E-07 | 3.77E-05    | AR                                             |
| 53                      | Regulation of Androgen receptor activity                                                                                                       | 4                      | 0.0755 | 5.53E-08 | 7.35E-05    | AR                                             |
| 21                      | p38 signaling mediated by MAPKAP kinases                                                                                                       | 3                      | 0.1429 | 4.04E-07 | 2.69E-04    | MAPK14                                         |
| 200                     | Genes defining late response to estrogen.                                                                                                      | 4                      | 0.02   | 1.14E-05 | 2.84E-04    |                                                |
| 36                      | Adrenergic Pathway                                                                                                                             | 3                      | 0.0833 | 2.16E-06 | 7.79E-04    |                                                |
| 37                      | p38 MAPK Pathway                                                                                                                               | 3                      | 0.0811 | 2.34E-06 | 7.79E-04    | MAPK14                                         |
| 309                     | Genes down-regulated in LNCaP cells by overexpression of SOX4 [GeneID=6659] and up-regulated by its RNAi knockdown.                            | 5                      | 0.0162 | 2.31E-06 | 9.91E-04    | SOX4                                           |
| 44                      | FOXA1 transcription factor network                                                                                                             | 3                      | 0.0682 | 3.98E-06 | 1.06E-03    | FOXA1                                          |
| 48                      | Notch-mediated HES/HEY network                                                                                                                 | 3                      | 0.0625 | 5.19E-06 | 1.15E-03    | HES/HEY/NOTCH                                  |
| 169                     | Pubertal genes up-regulated by TGFB1 [GeneID=7040].                                                                                            | 4                      | 0.0237 | 5.86E-06 | 1.26E-03    | TGFB1                                          |
| 1024                    | Genes down-regulated in PC3 cells (prostate cancer) after knockdown of EZH2 [GeneID=2146] by RNAi.                                             | 7                      | 0.0068 | 5.53E-06 | 1.26E-03    | EZH2                                           |
| 61                      | Coregulation of Androgen receptor activity                                                                                                     | 3                      | 0.0492 | 1.07E-05 | 2.04E-03    | AR                                             |
| 65                      | IL4-mediated signaling events                                                                                                                  | 3                      | 0.0462 | 1.30E-05 | 2.16E-03    | IL4                                            |
| 76                      | VEGF signaling pathway                                                                                                                         | 3                      | 0.0395 | 2.08E-05 | 3.11E-03    | VEGF                                           |
| 89                      | Prostate cancer                                                                                                                                | 3                      | 0.0337 | 3.34E-05 | 3.11E-03    |                                                |
| 11                      | Amplification hot spot 29: colocalized fragile sites and cancer genes in the 7p22-p13 region.                                                  | 2                      | 0.1818 | 2.57E-05 | 3.33E-03    |                                                |
| 86                      | Genes up-regulated in LNCaP cells (prostate cancer) in response to synthetic androgen R1881 [PubChem=13766].                                   | 3                      | 0.0349 | 3.02E-05 | 3.45E-03    |                                                |
| 200                     | Genes up-regulated through activation of mTORC1 complex.                                                                                       | 3                      | 0.015  | 3.67E-04 | 3.67E-03    | MTOR                                           |
| 200                     | A subgroup of genes regulated by MYC - version 1 (v1).                                                                                         | 3                      | 0.015  | 3.67E-04 | 3.67E-03    | MYC                                            |
| 975                     | Expressed genes associated with high-confidence PAX3-FOXO1 sites with enhancers in primary tumors and cell lines                               | 6                      | 0.0062 | 5.08E-05 | 4.84E-03    | PAX3/FOXO1                                     |
| 328                     | Pathways in cancer                                                                                                                             | 4                      | 0.0122 | 7.82E-05 | 4.85E-03    |                                                |
| 323                     | Genes from common genomic gains observed in a meta analysis of copy number alterations across a panel of different cancer cell lines and tumor | 4                      | 0.0124 | 7.37E-05 | 6.33E-03    |                                                |
| 22                      | Apoptotic Signaling in Response to DNA Damage                                                                                                  | 2                      | 0.0909 | 1.08E-04 | 8.85E-03    |                                                |
| 24                      | Regulation of eIF4e and p70 S6 Kinase                                                                                                          | 2                      | 0.0833 | 1.28E-04 | 8.85E-03    | EIF4E/RPS6KB1                                  |
| 27                      | Transcription factor CREB and its extracellular signals                                                                                        | 2                      | 0.0741 | 1.63E-04 | 8.85E-03    | CREB                                           |

## Continued from Table S3

| # Genes in Gene Set (K) | Description                                                                                                                             | # Genes in Overlap (k) | k/K    | p-value  | FDR q-value | relevant gene in process or pathway regulation |
|-------------------------|-----------------------------------------------------------------------------------------------------------------------------------------|------------------------|--------|----------|-------------|------------------------------------------------|
| 84                      | Genes involved in Regulation of mRNA Stability by Proteins that Bind AU-rich Elements                                                   | 3                      | 0.0357 | 2.81E-05 | 9.48E-03    |                                                |
| 466                     | Genes involved in Hemostasis                                                                                                            | 5                      | 0.0107 | 1.69E-05 | 9.48E-03    |                                                |
| 30                      | Retinoic acid receptors-mediated signaling                                                                                              | 2                      | 0.0667 | 2.02E-04 | 1.30E-02    |                                                |
| 31                      | Nongenotropic Androgen signaling                                                                                                        | 2                      | 0.0645 | 2.16E-04 | 1.30E-02    |                                                |
| 31                      | CD40/CD40L signaling                                                                                                                    | 2                      | 0.0645 | 2.16E-04 | 1.30E-02    | CD40/CD40L                                     |
| 40                      | p38 MAPK Signaling Pathway                                                                                                              | 2                      | 0.05   | 3.60E-04 | 1.30E-02    | MAPK14                                         |
| 432                     | Expressed genes associated with super-high-confidence PAX3-FOXO1 sites with highly-recurrent enhancers in primary tumors and cell lines | 4                      | 0.0093 | 2.25E-04 | 1.40E-02    | PAX3/FOXO1                                     |
| 17                      | Genes involved in Destabilization of mRNA by KSRP                                                                                       | 2                      | 0.1176 | 6.35E-05 | 1.43E-02    | KSRP                                           |
| 34                      | IL2 signaling events mediated by PI3K                                                                                                   | 2                      | 0.0588 | 2.60E-04 | 1.44E-02    | IL2                                            |
| 38                      | FAS (CD95) signaling pathway                                                                                                            | 2                      | 0.0526 | 3.25E-04 | 1.66E-02    | CD95                                           |
| 38                      | Signaling mediated by p38-alpha and p38-beta                                                                                            | 2                      | 0.0526 | 3.25E-04 | 1.66E-02    |                                                |
| 102                     | Toll-like receptor signaling pathway                                                                                                    | 2                      | 0.0196 | 6.49E-04 | 1.69E-02    | TLR2                                           |
| 194                     | Cell cycle genes with peak expression in G1/S check point.                                                                              | 3                      | 0.0155 | 3.36E-04 | 1.83E-02    |                                                |
| 43                      | CXCR3-mediated signaling events                                                                                                         | 2                      | 0.0465 | 4.17E-04 | 1.91E-02    | CXCR3                                          |
| 45                      | Integrin-linked kinase signaling                                                                                                        | 2                      | 0.0444 | 4.56E-04 | 2.02E-02    |                                                |
| 47                      | IL6-mediated signaling events                                                                                                           | 2                      | 0.0426 | 4.98E-04 | 2.13E-02    | IL6                                            |
| 49                      | Genes involved in Nuclear Receptor transcription pathway                                                                                | 2                      | 0.0408 | 5.41E-04 | 2.25E-02    |                                                |
| 50                      | Angiopoietin receptor Tie2-mediated signaling                                                                                           | 2                      | 0.04   | 5.64E-04 | 2.27E-02    | TEK                                            |
| 253                     | Genes down-regulated by MYC according to the MYC Target Gene Database.                                                                  | 3                      | 0.0119 | 7.27E-04 | 2.68E-02    | MYC                                            |
| 57                      | Thromboxane A2 receptor signaling                                                                                                       | 2                      | 0.0351 | 7.32E-04 | 2.78E-02    | TBXA2R                                         |
| 59                      | p53 pathway                                                                                                                             | 2                      | 0.0339 | 7.84E-04 | 2.89E-02    | TP53                                           |
| 79                      | Direct targets of PRDM5                                                                                                                 | 2                      | 0.0253 | 2.62E-04 | 3.00E-02    | PRDM5                                          |
| 63                      | Endothelins                                                                                                                             | 2                      | 0.0317 | 8.93E-04 | 3.08E-02    | EDN1/EDN2/EDN3                                 |
| 65                      | BCR signaling pathway                                                                                                                   | 2                      | 0.0308 | 9.51E-04 | 3.08E-02    | BCR                                            |
| 65                      | Regulation of retinoblastoma protein                                                                                                    | 2                      | 0.0308 | 9.51E-04 | 3.08E-02    | RB1                                            |
| 65                      | Fas Signaling Pathway                                                                                                                   | 2                      | 0.0308 | 9.51E-04 | 3.08E-02    | CD95                                           |
| 284                     | Genes involved in Metabolism of mRNA                                                                                                    | 3                      | 0.0106 | 1.01E-03 | 3.21E-02    |                                                |
| 69                      | Signaling events mediated by VEGFR1 and VEGFR2                                                                                          | 2                      | 0.029  | 1.07E-03 | 3.31E-02    | VEGFR1/VEGFR2                                  |
| 144                     | Genes down-regulated in response to ultraviolet (UV) radiation.                                                                         | 2                      | 0.0139 | 4.55E-03 | 3.79E-02    |                                                |
| 267                     | MAPK signaling pathway                                                                                                                  | 3                      | 0.0112 | 8.49E-04 | 3.95E-02    |                                                |
| 79                      | Fc epsilon RI signaling pathway                                                                                                         | 2                      | 0.0253 | 1.40E-03 | 4.23E-02    | FCER1G                                         |
| 82                      | Glucocorticoid receptor regulatory network                                                                                              | 2                      | 0.0244 | 1.51E-03 | 4.35E-02    | NR3C1                                          |
| 82                      | Regulation of nuclear SMAD2/3 signaling                                                                                                 | 2                      | 0.0244 | 1.51E-03 | 4.35E-02    | SMAD2/SMAD3                                    |
| 84                      | C-MYB transcription factor network                                                                                                      | 2                      | 0.0238 | 1.58E-03 | 4.37E-02    | MYB                                            |
| 330                     | Genes involved in Metabolism of RNA                                                                                                     | 3                      | 0.0091 | 1.56E-03 | 4.37E-02    |                                                |

**Table S4.** GEPIA analysis results of relevant genes in process or pathway regulation reported in Supplementary Table 3 using the TCGA-Prostate Cancer dataset (PRAD).

|           |                                                           | ANOVA analysis for tumors vs paired normal human prostate sample * |          | Disease free survival** |           |
|-----------|-----------------------------------------------------------|--------------------------------------------------------------------|----------|-------------------------|-----------|
| GENE NAME | PROTEIN NAME                                              | Log2 FC                                                            | adjP     | Logrank                 | HR (high) |
| CD40      | CD40 molecule                                             | -1.6                                                               | 7.05E-43 |                         |           |
| CXCR3     | C-X-C motif chemokine receptor 3                          |                                                                    |          | 1.0E-02                 | 1.8       |
| EDN3      | endothelin 3                                              | -1.7                                                               | 7.5E-38  | 5.4E-03                 | 0.6       |
| EZH2      | enhancer of zeste 2 polycomb repressive complex 2 subunit |                                                                    |          | 4.0E-04                 | 2.2       |
| FOXA1     | forkhead box A1                                           | 1.4                                                                | 3.7E-55  |                         |           |
| HES6      | hes family bHLH transcription factor 6                    |                                                                    |          | 4.8E-02                 | 1.5       |
| IL4       | interleukin 4                                             | -1.2                                                               | 1.2E-35  |                         |           |
| MTOR      | mechanistic target of rapamycin                           |                                                                    |          | 2.7E-02                 | 0.62      |
| NOTCH1    | notch 1                                                   | -1.4                                                               | 1.51E-32 |                         |           |
| NOTCH3    | notch 3                                                   |                                                                    |          | 4.9E-03                 | 1.8       |
| NOTCH4    | notch 4                                                   | -1.8                                                               | 5.1E-63  | 2.8E-02                 | 1.6       |
| PRDM5     | PR/SET domain 5                                           | -1.1                                                               | 1.19E-37 |                         |           |
| SMAD2     | SMAD family member 2                                      | -1.2                                                               | 1.53E-32 |                         |           |
| SOX4      | SRY-box 4                                                 | 1.3                                                                | 1.6E-48  |                         |           |
| TGFB1     | transforming growth factor beta 1                         | -1.6                                                               | 1.61E-32 | 1.2E-04                 | 2.3       |
| TLR2      | toll like receptor 2                                      | -1.1                                                               | 5.63E-37 |                         |           |
| TP53      | tumor protein p53                                         | 3.7                                                                | 0.0014   | 4.5E-02                 | 0.65      |
| VEGFA     | vascular endothelial growth factor A                      | -1.4                                                               | 1.54E-8  |                         |           |

\* selection parameters:  $|\log_2\text{fold-change}| \geq 1$  and adjusted P value < 0.05

\*\* selection parameters: Group cutoff, median and log rank < 0.05

**Table S5.** The 50-gene set list with correspondent protein name, association with androgen receptor retrieved from literature and disease term obtained using Gene Set to Diseases web platform (<http://cbdm.uni-mainz.de/geneset2diseases>).

| Uniprot | GENE NAME | PROTEIN NAME                                                     | Association with Androgen Receptor [34,38-45]     | Prostatic Neoplasms | Prostatic Neoplasms, Castration-Resistant | Neoplasm Invasiveness | Neoplasm Metastasis | Carcinogenesis |
|---------|-----------|------------------------------------------------------------------|---------------------------------------------------|---------------------|-------------------------------------------|-----------------------|---------------------|----------------|
| O43707  | ACTN4     | Alpha-actinin-4                                                  | AR coactivator/ corepressor                       |                     |                                           | yes                   | yes                 |                |
| Q9UHI8  | ADAMTS1   | A disintegrin and metalloproteinase with thrombospondin motifs 1 |                                                   |                     |                                           |                       |                     |                |
| P31749  | AKT1      | RAC-alpha serine/threonine-protein kinase                        | AR corepressor, direct interaction                | yes                 | yes                                       | yes                   | yes                 | yes            |
| P51648  | ALDH3A2   | Fatty aldehyde dehydrogenase                                     |                                                   |                     |                                           |                       |                     |                |
| P10275  | AR        | Androgen receptor                                                | AR controlled, direct interaction                 | yes                 | yes                                       | yes                   | yes                 |                |
| Q12797  | ASPH      | Aspartyl/asparaginyl beta-hydroxylase                            |                                                   |                     |                                           |                       |                     |                |
| P05026  | ATP1B1    | Sodium/potassium-transporting ATPase subunit beta-1              | AR controlled                                     |                     |                                           |                       |                     |                |
| P27824  | CANX      | Calnexin                                                         |                                                   |                     |                                           |                       |                     |                |
| P25942  | CD40      | CD40 molecule                                                    |                                                   |                     |                                           |                       |                     |                |
| P49682  | CXCR3     | C-X-C motif chemokine receptor 3                                 |                                                   |                     |                                           | yes                   |                     |                |
| P14138  | EDN3      | endothelin 3                                                     |                                                   |                     |                                           |                       |                     |                |
| Q9NZC4  | EHF       | ETS homologous factor                                            |                                                   | yes                 |                                           | yes                   |                     |                |
| P29320  | EPHA3     | Ephrin type-A receptor 3                                         | AR controlled                                     |                     |                                           |                       |                     |                |
| P50549  | ETV1      | ETS translocation variant 1                                      | AR coregulator, direct interaction, AR controlled | yes                 |                                           | yes                   |                     |                |
| Q15910  | EZH2      | enhancer of zeste 2 polycomb repressive complex 2 subunit        | AR controlled                                     | yes                 | yes                                       | yes                   | yes                 | yes            |
| P55317  | FOXA1     | forkhead box A1                                                  | AR coactivator/ corepressor; direct interactor    | yes                 |                                           | yes                   | yes                 |                |

| Continued from Table S5 |           |                                                                                    |                                                    |                     |                                           |                       |                     |                |
|-------------------------|-----------|------------------------------------------------------------------------------------|----------------------------------------------------|---------------------|-------------------------------------------|-----------------------|---------------------|----------------|
| Uniprot                 | GENE NAME | PROTEIN NAME                                                                       | Association with Androgen Receptor [34,38-45]      | Prostatic Neoplasms | Prostatic Neoplasms, Castration-Resistant | Neoplasm Invasiveness | Neoplasm Metastasis | Carcinogenesis |
| Q96HZ4                  | HES6      | hes family bHLH transcription factor 6                                             | AR controlled                                      |                     |                                           |                       |                     |                |
| P61978                  | HNRNPK    | Heterogeneous nuclear ribonucleoprotein K                                          | AR coregulator                                     |                     |                                           | yes                   | yes                 |                |
| Q00839                  | HNRNPU    | Heterogeneous nuclear ribonucleoprotein U                                          |                                                    |                     |                                           |                       |                     |                |
| P31271                  | HOXA13    | Homeobox protein Hox-A13                                                           |                                                    |                     |                                           |                       |                     |                |
| Q92826                  | HOXB13    | Homeobox protein Hox-B13                                                           | AR coactivator, direct interaction , AR controlled | yes                 |                                           | yes                   | yes                 |                |
| P04792                  | HSPB1     | Heat shock protein beta-1; HSP27                                                   | AR coactivator, direct interaction , AR controlled |                     |                                           | yes                   |                     |                |
| P05112                  | IL4       | interleukin 4                                                                      |                                                    |                     |                                           |                       |                     |                |
| P12268                  | IMPDH2    | Inosine-5-monophosphate dehydrogenase 2                                            |                                                    |                     |                                           |                       |                     |                |
| Q07666                  | KHDRBS1   | KH domain-containing, RNA-binding, signal transduction-associated protein 1; Sam68 | AR coactivator, direct interaction                 |                     |                                           |                       |                     |                |
| P07288                  | KLK3      | Prostate-specific antigen                                                          | AR controlled                                      | yes                 | yes                                       |                       | yes                 |                |
| Q16539                  | MAPK14    | p38MAPK                                                                            |                                                    |                     |                                           | yes                   | yes                 | yes            |
| P42345                  | MTOR      | mechanistic target of rapamycin                                                    |                                                    | yes                 |                                           | yes                   | yes                 | yes            |
| P10242                  | MYB       | V-myb myeloblastosis viral oncogene homologue                                      | AR controlled                                      |                     |                                           | yes                   |                     |                |
| O15394                  | NCAM2     | Neural cell adhesion molecule 2                                                    |                                                    |                     |                                           |                       |                     |                |
| P46531                  | NOTCH1    | notch 1                                                                            |                                                    |                     |                                           | yes                   | yes                 | yes            |
| Q9UM47                  | NOTCH3    | notch 3                                                                            |                                                    |                     |                                           |                       |                     | yes            |
| Q99466                  | NOTCH4    | notch 4                                                                            |                                                    |                     |                                           | yes                   |                     |                |

Continued from Table S5

| Uniprot | GENE NAME | PROTEIN NAME                                     | Association with Androgen Receptor [34,38-45] | Prostatic Neoplasms | Prostatic Neoplasms, Castration-Resistant | Neoplasm Invasiveness | Neoplasm Metastasis | Carcinogenesis |
|---------|-----------|--------------------------------------------------|-----------------------------------------------|---------------------|-------------------------------------------|-----------------------|---------------------|----------------|
| P09874  | PARP1     | Poly [ADP-ribose] polymerase 1                   | AR controlled                                 | yes                 |                                           |                       |                     |                |
| Q02548  | PAX5      | Paired box protein Pax-5                         |                                               |                     |                                           |                       |                     |                |
| P30086  | PEBP1     | Raf kinase inhibitor protein (RKIP)              |                                               | yes                 |                                           | yes                   | yes                 |                |
| P37231  | PPARG     | Peroxisome proliferator-activated receptor gamma | AR coregulator, AR controlled                 |                     |                                           |                       |                     |                |
| Q9NQX1  | PRDM5     | PR/SET domain 5                                  |                                               |                     |                                           |                       |                     |                |
| Q96PU8  | QKI       | Quaking                                          |                                               |                     |                                           |                       |                     |                |
| Q15796  | SMAD2     | SMAD family member 2                             |                                               |                     |                                           | yes                   | yes                 |                |
| Q00796  | SORD      | Sorbitol dehydrogenase                           | AR controlled                                 |                     |                                           |                       |                     |                |
| Q06945  | SOX4      | SRY-box 4                                        | AR controlled                                 | yes                 |                                           | yes                   | yes                 |                |
| Q9BUD6  | SPON2     | Spondin-2                                        | AR controlled                                 |                     |                                           |                       |                     |                |
| P01137  | TGFB1     | transforming growth factor beta 1                |                                               |                     |                                           | yes                   | yes                 | yes            |
| O60603  | TLR2      | toll like receptor 2                             |                                               |                     |                                           |                       |                     |                |
| P04637  | TP53      | tumor protein p53                                | AR corepressor; indirect interactor           |                     |                                           | yes                   | yes                 | yes            |
| P46939  | UTRN      | Utrophin                                         |                                               |                     |                                           |                       |                     |                |
| P15692  | VEGFA     | vascular endothelial growth factor A             |                                               |                     |                                           | yes                   | yes                 | yes            |
| P17861  | XBP1      | X-box binding protein 1                          |                                               |                     |                                           |                       |                     |                |
| O95409  | ZIC2      | Zic family member 2                              | AR controlled                                 |                     |                                           |                       |                     |                |

**Table S6.** Log2fold-change values of 50-gene set obtained by GEO2R analysis. The eight GEO datasets reporting mRNA data were analyzed using the expression levels thresholds  $|\log_2\text{fold-change}| \geq 1$  and adjusted  $P < 0.05$

|           | mPCa vs PCa |         |          | mCRPC vs PCa |         |          |         |          |
|-----------|-------------|---------|----------|--------------|---------|----------|---------|----------|
| GENE NAME | GSE3325     | GSE3933 | GSE68882 | GSE32269     | GSE6811 | GSE70770 | GSE6752 | GSE35988 |
| ACTN4     |             |         |          |              |         |          |         |          |
| ADAMTS1   | -3.2        |         |          |              |         |          | 1.5     |          |
| AKT1      |             |         |          |              |         |          |         |          |
| ALDH3A2   |             |         |          | -1.4         | -1.4    |          | -2.5    |          |
| AR        |             | 1.5     |          | 2.4          |         |          | 2.0     | 1.5      |
| ASPH      | 3.6         |         |          | 1.1          |         |          |         |          |
| ATP1B1    | 1.4         |         |          |              |         |          |         |          |
| CANX      |             |         |          |              |         |          |         |          |
| CD40      | -1.6        |         |          |              |         |          | -2.0    |          |
| CXCR3     |             |         |          |              |         |          | 1.1     |          |
| EDN3      | -1.9        | -1.1    |          |              |         |          | -1.8    |          |
| EHF       | -1.8        |         |          |              |         |          | -2.2    |          |
| EPHA3     | -3.7        |         |          |              |         |          | -2.4    |          |
| ETV1      | 2           |         |          |              |         |          | -1.1    |          |
| EZH2      | 2.5         |         | 1.6      | 1.8          |         |          |         |          |
| FOXA1     | -1.0        |         |          |              |         | -1.6     | -1.2    |          |
| HES6      |             |         |          |              |         |          |         |          |
| HNRNPK    |             |         |          |              |         |          |         |          |
| HNRNPU    |             |         |          |              |         |          |         |          |
| HOXA13    | -2.5        |         |          |              |         |          |         |          |
| HOXB13    | -2.5        |         |          | -1.4         | -1.7    |          |         |          |
| HSPB1     |             |         |          |              |         |          |         |          |
| IL4       |             |         |          |              | -1.4    |          | 1.1     |          |
| IMPDH2    |             |         |          |              |         |          |         |          |
| KHDRBS1   | 1.4         |         |          |              |         |          |         |          |
| KLK3      | 3.9         |         | -2.1     | -1.6         |         | -2.6     | -3.8    |          |
| MAPK14    |             |         |          |              |         |          |         |          |
| MTOR      |             |         |          |              |         |          |         |          |
| MYB       |             |         |          |              |         |          |         |          |
| NCAM2     | 1.6         |         |          |              |         |          | 1.2     |          |
| NOTCH1    |             |         |          |              |         | 1.0      |         |          |
| NOTCH3    |             |         | 1.1      | 1.2          |         |          | 1.0     |          |
| NOTCH4    |             |         |          |              |         |          | 1.0     |          |
| PARP1     |             |         |          |              |         |          |         |          |
| PAX5      | 1.5         |         |          |              |         |          |         |          |
| PEBP1     |             |         |          |              |         |          |         |          |
| PPARG     | 2.6         |         | 1.2      |              |         |          |         |          |
| PRDM5     | -2.6        |         |          |              |         |          |         |          |
| QKI       | -1.7        | 1.3     |          | 1.2          |         |          |         |          |

| Continued from Table S6 |             |         |          |              |         |          |         |          |
|-------------------------|-------------|---------|----------|--------------|---------|----------|---------|----------|
|                         | mPCa vs PCa |         |          | mCRPC vs PCa |         |          |         |          |
| GENE NAME               | GSE3325     | GSE3933 | GSE68882 | GSE32269     | GSE6811 | GSE70770 | GSE6752 | GSE35988 |
| SMAD2                   | 2.5         |         |          |              |         |          | -1.5    |          |
| SORD                    | -1.9        |         | -2.3     | -2.5         |         | -2.4     | -2.2    |          |
| SOX4                    | 1.6         |         |          |              |         |          |         |          |
| SPON2                   |             |         |          |              |         | -1.7     | -1.4    |          |
| TGFB1                   |             |         |          |              |         |          |         |          |
| TLR2                    |             |         |          |              |         |          |         |          |
| TP53                    | -2.4        |         |          |              |         |          |         |          |
| UTRN                    | 1           |         |          |              |         |          |         |          |
| VEGFA                   | 3.7         |         |          |              |         |          | 1.3     |          |
| XBP1                    |             | -1.2    | -1.2     | -1.4         | -1.8    | -1.5     | -1.4    |          |
| ZIC2                    | 6.0         |         |          |              |         |          | 4.3     |          |

**Table S7.** The PCa-gene set characteristics

| Gene name | Uniprot AC | Protein name                                                                       | Association with Androgen Receptor activity [34,38-45] |
|-----------|------------|------------------------------------------------------------------------------------|--------------------------------------------------------|
| ADAMTS1   | Q9UHI8     | A disintegrin and metalloproteinase with thrombospondin motifs 1                   |                                                        |
| ALDH3A2   | P51648     | Aldehyde dehydrogenase family 3 member A2                                          |                                                        |
| AR        | P10275     | Androgen receptor                                                                  | AR controlled, direct interactor                       |
| ASPH      | Q12797     | Aspartyl/asparaginyl beta-hydroxylase                                              |                                                        |
| ATP1B1    | P05026     | Sodium/potassium-transporting ATPase subunit beta-1                                | AR controlled                                          |
| CD40      | P25942     | CD40 molecule                                                                      |                                                        |
| CXCR3     | P49682     | C-X-C motif chemokine receptor 3                                                   |                                                        |
| EDN3      | P14138     | endothelin 3                                                                       |                                                        |
| EHF       | Q9NZC4     | ETS homologous factor                                                              |                                                        |
| EPHA3     | P29320     | Ephrin type-A receptor 3                                                           | AR controlled                                          |
| ETV1      | P50549     | ETS translocation variant 1                                                        | AR coregulator, direct interactor, AR controlled       |
| EZH2      | Q15910     | enhancer of zeste 2 polycomb repressive complex 2 subunit                          | AR controlled                                          |
| FOXA1     | P55317     | forkhead box A1                                                                    | AR coactivator/ corepressor; direct interactor         |
| HOXA13    | P31271     | Homeobox protein Hox-A13                                                           |                                                        |
| HOXB13    | Q92826     | Homeobox protein Hox-B13                                                           | AR coactivator, direct interactor, AR controlled       |
| KHDRBS1   | Q07666     | KH domain-containing, RNA-binding, signal transduction-associated protein 1; Sam68 | AR coactivator, direct interactor                      |
| KLK3      | P07288     | Prostate-specific antigen                                                          | AR controlled                                          |
| NCAM2     | O15394     | Neural cell adhesion molecule 2                                                    |                                                        |
| NOTCH1    | P46531     | notch 1                                                                            |                                                        |
| NOTCH3    | Q9UM47     | notch 3                                                                            |                                                        |
| NOTCH4    | Q99466     | notch 4                                                                            |                                                        |
| PAX5      | Q02548     | Paired box protein Pax-5                                                           |                                                        |
| PPARG     | P37231     | Peroxisome proliferator-activated receptor gamma                                   | AR coregulator, AR controlled                          |
| PRDM5     | Q9NQX1     | PR/SET domain 5                                                                    |                                                        |
| QKI       | Q96PU8     | Quaking                                                                            |                                                        |
| SMAD2     | Q15796     | SMAD family member 2                                                               |                                                        |
| SORD      | Q00796     | Sorbitol dehydrogenase                                                             | AR controlled                                          |
| SOX4      | Q06945     | SRY-box 4                                                                          | AR controlled                                          |
| SPON2     | Q9BUD6     | Spondin-2                                                                          | AR controlled                                          |
| TP53      | P04637     | tumor protein p53                                                                  | AR corepressor; indirect interactor                    |
| UTRN      | P46939     | Utrophin                                                                           |                                                        |
| VEGFA     | P15692     | vascular endothelial growth factor A                                               |                                                        |
| XBP1      | P17861     | X-box binding protein 1                                                            |                                                        |
| ZIC2      | O95409     | Zic family member 2                                                                | AR controlled                                          |

**Table S8.** The 34 PCa-gene set differential expression in metastatic versus primary PCa (MP1) and in mCRPC versus PCa (MP2) comparison, and their prognostic efficiency evaluated by ROC curve analysis.

|                        | Deregulated expression |                    | Prognostic efficiency (ROC analysis) <sup>£</sup>               |                                                         |                                                 |                                                            |                                                |                                  |
|------------------------|------------------------|--------------------|-----------------------------------------------------------------|---------------------------------------------------------|-------------------------------------------------|------------------------------------------------------------|------------------------------------------------|----------------------------------|
| Gene name <sup>#</sup> | mPCa vs PCa (MP1)      | mCRPC vs PCa (MP2) | Disease-specific Survival status (dead with tumor) <sup>§</sup> | Disease free status (recurred/ progressed) <sup>§</sup> | Progression free status (recurred) <sup>§</sup> | New Neoplasm Event Post Initial Therapy (yes) <sup>§</sup> | Subgroup 1 (high recurrence risk) <sup>§</sup> | Metastasis presence <sup>§</sup> |
| ADAMTS1                | down                   |                    | 0.80943                                                         |                                                         |                                                 |                                                            | 0.65336                                        | 0.79028                          |
| ALDH3A2                |                        | down               |                                                                 | 0.67131                                                 |                                                 |                                                            | 0.80643                                        | 0.89916                          |
| AR *                   | up                     | up                 |                                                                 |                                                         |                                                 |                                                            |                                                | 0.87746                          |
| ASPH                   | up                     | up                 |                                                                 |                                                         |                                                 |                                                            |                                                |                                  |
| ATP1B1*                | up                     |                    |                                                                 |                                                         |                                                 |                                                            |                                                |                                  |
| CD40                   | down                   | down               |                                                                 |                                                         |                                                 |                                                            | 0.78931                                        |                                  |
| CXCR3                  |                        | up                 |                                                                 |                                                         |                                                 |                                                            |                                                |                                  |
| EDN3                   | down                   | down               | 0.8377                                                          | 0.61001                                                 |                                                 |                                                            | 0.8823                                         |                                  |
| EHF                    | down                   | down               |                                                                 |                                                         |                                                 |                                                            |                                                | 0.66171                          |
| EPHA3*                 | down                   | down               |                                                                 | 0.60871                                                 |                                                 |                                                            | 0.7248                                         | 0.94134                          |
| ETV1*                  |                        | down               |                                                                 |                                                         |                                                 |                                                            | 0.6088                                         |                                  |
| EZH2*                  | up                     | up                 |                                                                 |                                                         | 0.65711                                         | 0.64478                                                    | 0.75452                                        | 0.86822                          |
| FOXA1*                 | down                   | down               |                                                                 |                                                         |                                                 |                                                            |                                                |                                  |
| HOXA13                 | down                   |                    |                                                                 |                                                         |                                                 |                                                            | 0.60046                                        |                                  |
| HOXB13*                | down                   | down               |                                                                 |                                                         |                                                 |                                                            |                                                |                                  |
| KHDRBS1*               | up                     |                    |                                                                 |                                                         |                                                 |                                                            |                                                |                                  |
| KLK3*                  |                        | down               |                                                                 |                                                         |                                                 |                                                            |                                                | 0.68903                          |
| NCAM2                  | up                     | up                 |                                                                 |                                                         |                                                 |                                                            |                                                |                                  |

Continued from Table S8

|                        | Deregulated expression |                    | Prognostic efficiency (ROC analysis) £                          |                                                         |                                                 |                                                            |                                                |                                  |
|------------------------|------------------------|--------------------|-----------------------------------------------------------------|---------------------------------------------------------|-------------------------------------------------|------------------------------------------------------------|------------------------------------------------|----------------------------------|
| Gene name <sup>#</sup> | mPCa vs PCa (MP1)      | mCRPC vs PCa (MP2) | Disease-specific Survival status (dead with tumor) <sup>§</sup> | Disease free status (recurred/ progressed) <sup>§</sup> | Progression free status (recurred) <sup>§</sup> | New Neoplasm Event Post Initial Therapy (yes) <sup>§</sup> | Subgroup 1 (high recurrence risk) <sup>§</sup> | Metastasis presence <sup>§</sup> |
| NOTCH1                 |                        | up                 |                                                                 |                                                         |                                                 | 0.63983                                                    |                                                |                                  |
| NOTCH3                 | up                     | up                 |                                                                 |                                                         | 0.62246                                         | 0.6302                                                     |                                                | 0.7947                           |
| NOTCH4                 |                        | up                 |                                                                 |                                                         |                                                 |                                                            |                                                |                                  |
| PAX5                   | up                     |                    |                                                                 |                                                         |                                                 |                                                            |                                                | 0.64002                          |
| PPARG*                 | up                     |                    |                                                                 |                                                         |                                                 |                                                            |                                                |                                  |
| PRDM5                  | down                   |                    |                                                                 |                                                         |                                                 |                                                            | 0.69758                                        | 0.89634                          |
| QKI                    |                        | up                 |                                                                 |                                                         |                                                 |                                                            |                                                |                                  |
| SMAD2                  | up                     | down               |                                                                 |                                                         |                                                 |                                                            |                                                |                                  |
| <b>SORD</b>            | down                   | down               |                                                                 |                                                         |                                                 |                                                            | 0.619                                          | 0.79952                          |
| SOX4*                  | up                     |                    |                                                                 |                                                         |                                                 |                                                            | 0.68257                                        | 0.7047                           |
| <b>SPON2*</b>          |                        | down               | 0.78852                                                         |                                                         |                                                 |                                                            |                                                |                                  |
| TP53*                  | down                   |                    |                                                                 |                                                         |                                                 |                                                            |                                                |                                  |
| UTRN                   | up                     |                    |                                                                 |                                                         |                                                 |                                                            |                                                |                                  |
| VEGFA                  | up                     | up                 |                                                                 |                                                         |                                                 |                                                            |                                                |                                  |
| XBP1                   | down                   | down               |                                                                 |                                                         |                                                 |                                                            | 0.71105                                        | 0.85818                          |
| ZIC2*                  | up                     | up                 |                                                                 |                                                         |                                                 |                                                            |                                                | 0.71073                          |

<sup>#</sup> In bold genes shared by Table S8

<sup>\*</sup> AR-associated gene from Table S5

£ Only significant AUC value >0.6 (Asymptotic Probability < 0.05) are reported

§ From the Prostate Adenocarcinoma (PRAD-TCGA, PanCancer Atlas, 493 patient) study

§ From the Prostate Adenocarcinoma (MSK, Cancer Cell 2010, 150 patients) study

**Table S9.** The CRPC-gene set characteristics

| Gene name | Uniprot AC | Protein name                                                                  | Association with Androgen Receptor Activity [34,38-45] |
|-----------|------------|-------------------------------------------------------------------------------|--------------------------------------------------------|
| ALDH1A3   | P47895     | Aldehyde dehydrogenase family 1 member A3                                     | AR controlled                                          |
| AR        | P10275     | Androgen receptor                                                             | AR controlled, direct interactor                       |
| CDKN2A    | Q9NXV6     | CDKN2A-interacting protein                                                    |                                                        |
| CHGA      | P10645     | Chromogranin-A                                                                |                                                        |
| CHGB      | P05060     | Secretogranin-1                                                               |                                                        |
| EHF       | Q9NZC4     | ETS homologous factor                                                         |                                                        |
| ENO2      | P09104     | Gamma-enolase                                                                 |                                                        |
| EZH2      | Q15910     | enhancer of zeste 2 polycomb repressive complex 2 subunit                     | AR controlled                                          |
| FKBP5     | Q13451     | Peptidyl-prolyl cis-trans isomerase FKBP5                                     | AR controlled;AR coactivator; indirect interactor      |
| FOXA1     | P55317     | forkhead box A1                                                               | AR coactivator/ corepressor; direct interactor         |
| HES6      | Q96HZ4     | hes family bHLH transcription factor 6                                        | AR controlled                                          |
| HNRNPK    | P61978     | Heterogeneous nuclear ribonucleoprotein K                                     | AR coregulator                                         |
| HOXA13    | P31271     | Homeobox protein Hox-A13                                                      |                                                        |
| HOXB13    | Q92826     | Homeobox protein Hox-B13                                                      | AR coactivator, direct interactor , AR controlled      |
| KLK2      | P20151     | Kallikrein-2                                                                  | AR controlled                                          |
| KLK3      | P07288     | Prostate-specific antigen                                                     | AR controlled                                          |
| NKX3-1    | Q99801     | Homeobox protein Nkx-3.1                                                      | AR controlled                                          |
| PCSK1     | P29120     | Neuroendocrine convertase 1                                                   |                                                        |
| PIK3CB    | P42338     | Phosphatidylinositol 4,5-bisphosphate 3-kinase catalytic subunit beta isoform | AR coactivator                                         |
| PLPP1     | O14494     | Phospholipid phosphatase 1                                                    |                                                        |
| PMEPA1    | Q969W9     | Protein TMEPAI                                                                | direct interactor                                      |
| RB1       | P06400     | Retinoblastoma-associated protein                                             | AR coactivator, direct interactor                      |
| SCG3      | Q8WXD2     | Secretogranin-3                                                               |                                                        |
| SCN3A     | Q9NY46     | Sodium channel protein type 3 subunit alpha                                   |                                                        |
| SORD      | Q00796     | Sorbitol dehydrogenase                                                        | AR controlled                                          |
| SPON2     | Q9BUD6     | Spondin-2                                                                     | AR controlled                                          |
| STEAP2    | Q8NFT2     | Metalloreductase STEAP2                                                       |                                                        |
| STEAP4    | Q687X5     | Metalloreductase STEAP4                                                       |                                                        |
| SYN       | P08247     | Synaptophysin                                                                 |                                                        |
| TMPRSS2   | O15393     | Transmembrane protease serine 2                                               | AR controlled                                          |

**Table S10.** The CRPC-gene list reporting differential expression evaluated in CRPC AR- vs CRPC AR+ and diagnostic efficiency (AUC) evaluated by ROC curve analysis

|                        | Deregulated expression             | Diagnostic efficiency (AUC <sup>§</sup> ) from SU2C/PCF study (208 patients) |                       |               |               |                                 |                                    | Diagnostic efficiency (AUC*) from neuroendocrine-PC study (49 patients) |                                    |
|------------------------|------------------------------------|------------------------------------------------------------------------------|-----------------------|---------------|---------------|---------------------------------|------------------------------------|-------------------------------------------------------------------------|------------------------------------|
| Gene name <sup>#</sup> | CRPC AR- vs CRPC AR+ (mean LogFC§) | AR score > 0.25 (AR+)                                                        | AR score < 0.25 (AR-) | NE score >0.4 | NE score <0.4 | CRPC NE (high expression level) | CRPC ADENO (high expression level) | CRPC NE (high expression level)                                         | CRPC ADENO (high expression level) |
| CDKN2A                 | 1.27                               |                                                                              | 0.63216               | 0.92626       |               | 0.96355                         |                                    | NA                                                                      |                                    |
| CHGA                   | 1.09                               |                                                                              |                       | 0.75429       |               | 0.78079                         |                                    | 0.86765                                                                 |                                    |
| CHGB                   | 3.89                               |                                                                              | 0.71208               | 0.92273       |               | 0.8867                          |                                    | 0.9549                                                                  |                                    |
| ENO2                   | 1.93                               |                                                                              | 0.77604               | 0.90505       |               | 0.92611                         |                                    | 0.80686                                                                 |                                    |
| <b>EZH2*</b>           | 0.70                               |                                                                              | 0.78874               | 0.91717       |               | 0.90148                         |                                    | 0.7951                                                                  |                                    |
| HES6                   | 0.69                               |                                                                              | 0.64941               | 0.93889       |               | 0.98818                         |                                    | 0.91078                                                                 |                                    |
| PCSK1                  | 2.86                               |                                                                              | 0.78255               | 0.94394       |               | 0.99113                         |                                    | 0.88333                                                                 |                                    |
| SCG3                   | 2.81                               |                                                                              | 0.69743               | 0.9298        |               | 0.933                           |                                    | 0.85882                                                                 |                                    |
| SCN3A                  | 1.20                               |                                                                              | 0.83333               | 0.86869       |               | 0.97635                         |                                    | 0.84706                                                                 |                                    |
| SYP                    | 0.43                               |                                                                              |                       | 0.8358        |               | 0.867                           |                                    | 0.9274                                                                  |                                    |
| ALDH1A3                | -2.36                              | 0.78743                                                                      |                       |               |               |                                 | 0.61107                            |                                                                         | 0.90098                            |
| <b>AR*</b>             | -3.76                              | 0.94792                                                                      |                       |               | 0.9904        |                                 | 0.65376                            |                                                                         | 0.87647                            |
| <b>EHF</b>             | -0.62                              | 0.71549                                                                      |                       |               |               |                                 | 0.67371                            |                                                                         |                                    |
| FKBP5                  | -2.41                              | 0.79329                                                                      |                       |               |               |                                 | 0.67517                            |                                                                         | 0.7098                             |
| <b>FOXA1*</b>          | -1.73                              | 0.91178                                                                      |                       |               |               |                                 | 0.70992                            |                                                                         |                                    |
| HNRNPK                 | -0.39                              | 0.69798                                                                      |                       |               |               |                                 | 0.68171                            |                                                                         |                                    |
| <b>HOXA13</b>          | -1.00                              | 0.68262                                                                      |                       |               |               |                                 |                                    |                                                                         |                                    |
| <b>HOXB13*</b>         | -1.67                              | 0.90511                                                                      |                       |               | 0.96566       |                                 | 0.6385                             |                                                                         | 0.80588                            |
| KLK2                   | -3.41                              | 0.94336                                                                      |                       |               | 0.97879       |                                 |                                    |                                                                         | 0.85294                            |

| Continued from Table S10 |                                                 |                                                               |                       |               |               |                                 |                                    |                                                           |                                    |
|--------------------------|-------------------------------------------------|---------------------------------------------------------------|-----------------------|---------------|---------------|---------------------------------|------------------------------------|-----------------------------------------------------------|------------------------------------|
|                          | Deregulated expression                          | Diagnostic efficiency (AUC <sup>§</sup> ) from SU2C/PCF study |                       |               |               |                                 |                                    | Diagnostic efficiency (AUC*) from neuroendocrine-PC study |                                    |
| Gene name <sup>#</sup>   | CRPC AR- vs CRPC AR+ (mean LogFC <sub>S</sub> ) | AR score > 0.25 (AR+)                                         | AR score < 0.25 (AR-) | NE score >0.4 | NE score <0.4 | CRPC NE (high expression level) | CRPC ADENO (high expression level) | CRPC NE (high expression level)                           | CRPC ADENO (high expression level) |
| <b>KLK3*</b>             | -2.76                                           | 0.94499                                                       |                       |               | 0.97879       |                                 | 0.69697                            |                                                           | 0.91471                            |
| NKX3-1*                  | -3.27                                           | 0.91764                                                       |                       |               | 0.9904        |                                 |                                    |                                                           | 0.93333                            |
| PIK3CB                   | -0.83                                           | 0.7474                                                        |                       |               |               |                                 |                                    |                                                           |                                    |
| PLPP1                    | -1.63                                           | 0.9209                                                        |                       |               | 0.98434       |                                 | 0.61795                            |                                                           | 0.82157                            |
| PMEPA1                   | -2.46                                           | 0.92611                                                       |                       |               | 0.97071       |                                 | 0.62971                            |                                                           | 0.70392                            |
| RB1                      | -0.94                                           |                                                               |                       |               |               |                                 |                                    | NA                                                        |                                    |
| <b>SORD*</b>             | -1.64                                           | 0.7972                                                        |                       |               |               |                                 | 0.64398                            | NA                                                        |                                    |
| <b>SPON2</b>             | -2.40                                           | 0.78841                                                       |                       |               |               |                                 |                                    |                                                           | 0.68824                            |
| STEAP2                   | -3.13                                           | 0.93717                                                       |                       |               | 0.99949       |                                 |                                    |                                                           | 0.75882                            |
| STEAP4                   | -2.15                                           | 0.80534                                                       |                       |               | 0.93939       |                                 |                                    |                                                           | 0.78627                            |
| TMPRSS2                  | -3.00                                           | 0.93848                                                       |                       |               | 0.96566       |                                 | 0.61266                            |                                                           | 0.71176                            |

<sup>#</sup> In bold genes shared by Table S7

<sup>\*</sup> AR-associated gene from Table S5

<sup>§</sup> Only significant AUC values >0.6 (Asymptotic Probability < 0.05) are reported

<sup>§</sup> Average values across the GSE101607 and GSE77930 datasets

**Table S11.** FDA-approved drugs for neoplasms treatment.

| Drug                                                                              | CHEMBL ID                     | Target                     | Ref.*          | Inhibited Process                         | Potential clinical application |
|-----------------------------------------------------------------------------------|-------------------------------|----------------------------|----------------|-------------------------------------------|--------------------------------|
| Belinostat^                                                                       | <a href="#">CHEMBL408513</a>  | HDAC1                      | 49             | Epigenetic transcription regulation       | PCa Adeno-CRPC                 |
| Panobinostat^                                                                     | <a href="#">CHEMBL483254</a>  | HDAC1                      | 50,51,52       |                                           | PCa Adeno-CRPC                 |
| Vorinostat^                                                                       | <a href="#">CHEMBL98</a>      | HDAC1, HDAC2, HDAC3, HDAC6 | 52,53          |                                           | PCa Adeno-CRPC                 |
| Topotecan                                                                         | <a href="#">CHEMBL2362989</a> | TOP1                       | 54             |                                           | Adeno-CRPC                     |
| Etoposide^                                                                        | <a href="#">CHEMBL44657</a>   | TOP2A                      | 55,56          |                                           | PCa Adeno-CRPC                 |
| Teniposide^                                                                       | <a href="#">CHEMBL452231</a>  | TOP2A                      |                |                                           | Adeno-CRPC                     |
| Doxorubicin^                                                                      | <a href="#">CHEMBL53463</a>   | TOP2A, DNA                 | 57,58          |                                           | PCa Adeno-CRPC                 |
| Cytarabine                                                                        | <a href="#">CHEMBL803</a>     | DNA, RNA, DNA polymerase   | 59             |                                           | Adeno-CRPC NE- CRPC            |
| Bleomycin^                                                                        | <a href="#">CHEMBL403664</a>  | DNA                        | 60             |                                           | NE- CRPC                       |
| Midostaurin                                                                       | <a href="#">CHEMBL608533</a>  | VEGFR2, SCFR, PKC, FLT3    |                | MAP kinase signal transduction regulation | NE- CRPC                       |
| Axitinib                                                                          | <a href="#">CHEMBL1289926</a> | VEGFR3                     |                |                                           | Adeno-CRPC                     |
| Dabrafenib                                                                        | <a href="#">CHEMBL2028663</a> | BRAF                       | 61             |                                           | NE- CRPC                       |
| Afatinib                                                                          | <a href="#">CHEMBL1173655</a> | ERBB1, ERBB2, ERBB4        | 62,63          |                                           | Adeno-CRPC                     |
| Dasatinib                                                                         | <a href="#">CHEMBL1421</a>    | MEK1, MEK2                 | 8,64,65, 66,52 |                                           | NE- CRPC                       |
| Selumetinib                                                                       | <a href="#">CHEMBL1614701</a> | MEK1, MEK2                 |                |                                           | NE- CRPC                       |
| Trametinib^                                                                       | <a href="#">CHEMBL2103875</a> | MEK1, MEK2                 | 67             |                                           | NE- CRPC                       |
| Temsirolimus                                                                      | <a href="#">CHEMBL1201182</a> | FKBP1A                     | 68,52          |                                           | NE- CRPC                       |
| Methotrexate^                                                                     | <a href="#">CHEMBL34259</a>   | DHFR                       | 69             | Folate metabolism                         | PCa Adeno-CRPC                 |
| Vincristine^                                                                      | <a href="#">CHEMBL90555</a>   | TUBB1                      | 70             | Mitosis                                   | PCa Adeno-CRPC                 |
| Ciclopirox^                                                                       | <a href="#">CHEMBL1413</a>    | Iron chelator              | 71             | Multiple pathways                         | PCa Adeno-CRPC                 |
| *References reporting preclinical and clinical studies for PCa and CRPC treatment |                               |                            |                |                                           |                                |
| ^ Potentially active on essential genes FOXA1, HOXB13, ETV1, ADMATS1, EZH2 and AR |                               |                            |                |                                           |                                |
